# Supplementary material for: Yeast V-ATPase Proteolipid Ring Acts as a Large-conductance Transmembrane Protein Pore
Source: PubMed Central journal article supplement (PMC4838861; doi:10.1038/srep24774), 2016-04-21
Supplement: srep24774-s1.pdf [file srep24774-s1.pdf]

## Supplementary Information

### Yeast V-ATPase Proteolipid Ring Acts as a Large-conductance Transmembrane Protein Pore

Sergio Couoh-Cardel,<sup>1\*</sup> Yi-Ching Hsueh,<sup>2\*</sup> Stephan Wilkens<sup>1</sup> and Liviu Movileanu<sup>2,3,4</sup>

<sup>1</sup>Department of Biochemistry & Molecular Biology, SUNY Upstate Medical University, Syracuse, New York 13210, USA

<sup>2</sup>Department of Physics, Syracuse University, 201 Physics Bldg., Syracuse, New York 13244-1130, USA

<sup>3</sup>Structural Biology, Biochemistry, and Biophysics Program, Syracuse University, 111 College Place, Syracuse, New York 13244-4100, USA

<sup>4</sup>The Syracuse Biomaterials Institute, Syracuse University, 318 Bowne Hall, Syracuse, New York 13244-1200, USA

**Short Title:** Channel Features and Dimerization of Yeast V-ATPase Proteolipid Ring  
**Keywords:** Biochemistry; Biophysics & Structural Biology; Vacuolar ATPase; membrane transport; proteolipid ring; electrophysiology; membrane fusion; proton pump; protein structure; electron microscopy

\*These two authors contributed equally to this work.

**Correspondence:** Liviu Movileanu, Ph.D., Department of Physics, Syracuse University, 201 Physics Bldg., Syracuse, New York 13244-1130, USA. Phone: 315-443-8078; Fax: 315-443-9103; E-mail: [lmovilea@syr.edu](mailto:lmovilea@syr.edu); Web: <http://movileanulab.syr.edu/>

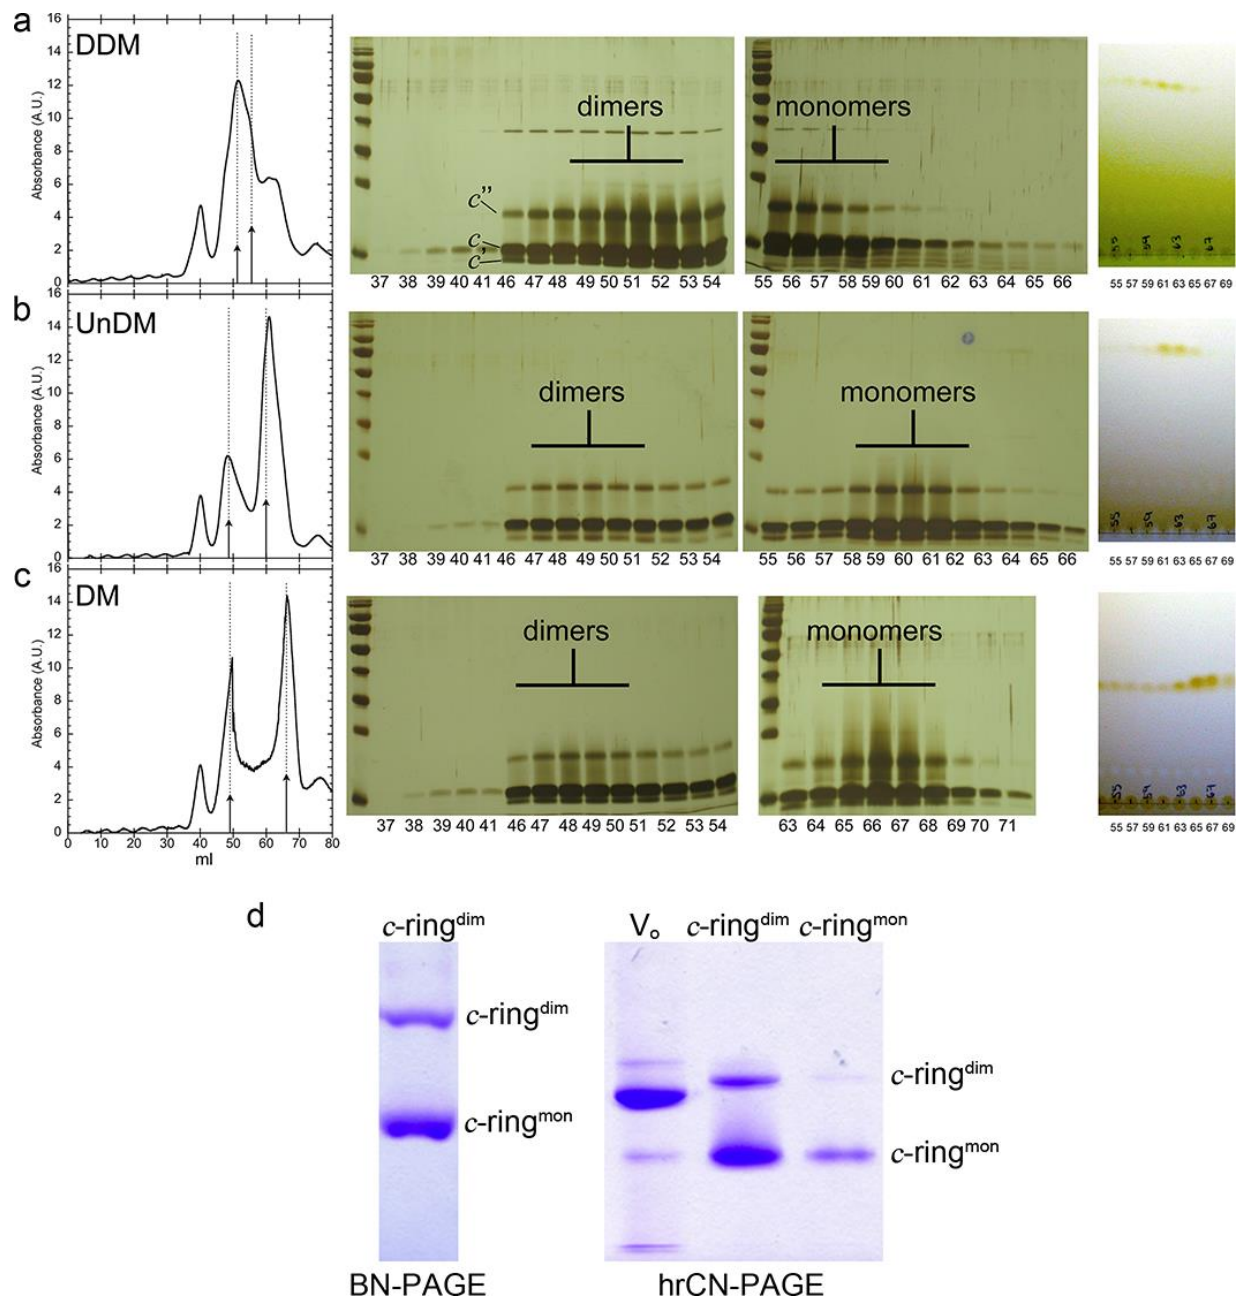

**Figure S1: Size-exclusion chromatography of yeast *V*-ATPase *c*-ring in dodecyl, undecyl and decyl maltoside.** Yeast total membranes were extracted with 0.6 mg DDM per mg of membrane protein and  $V_0$  was purified using 0.1% DDM in all buffers. Following removal of subunits *a* and *d* with LPPG/sarkosyl and ammonium sulfate precipitation, *c*-ring was dialyzed against 0.1% DDM containing buffer. *c*-ring was concentrated to ~2.7 mg/ml. ~2 mg was subjected to size-exclusion chromatography in either 0.02% DDM (a), 0.06% UnDM (b) or 0.18% DM (c). Fractions were analyzed by 13% SDS-PAGE and silver staining. The detergent content of the fractions was analyzed using thin-layer chromatography in chloroform/methanol/water (100:38.5:6.2 v/v) and visualized with iodine vapor. (d) Analysis of *c*-ring using blue native (BN) and high-resolution clear native (hrCN) 3-11% gradient PAGE<sup>1</sup>. Left gel: 5  $\mu$ g dimeric *c*-ring purified in UnDM. The negatively charged Coomassie Blue dye and/or the electric field leads to partial dissociation of the *c*-ring dimers. Right gel: 5  $\mu$ g  $V_0$ , 5  $\mu$ g of dimeric, and ~1  $\mu$ g of monomeric *c*-ring were analyzed.

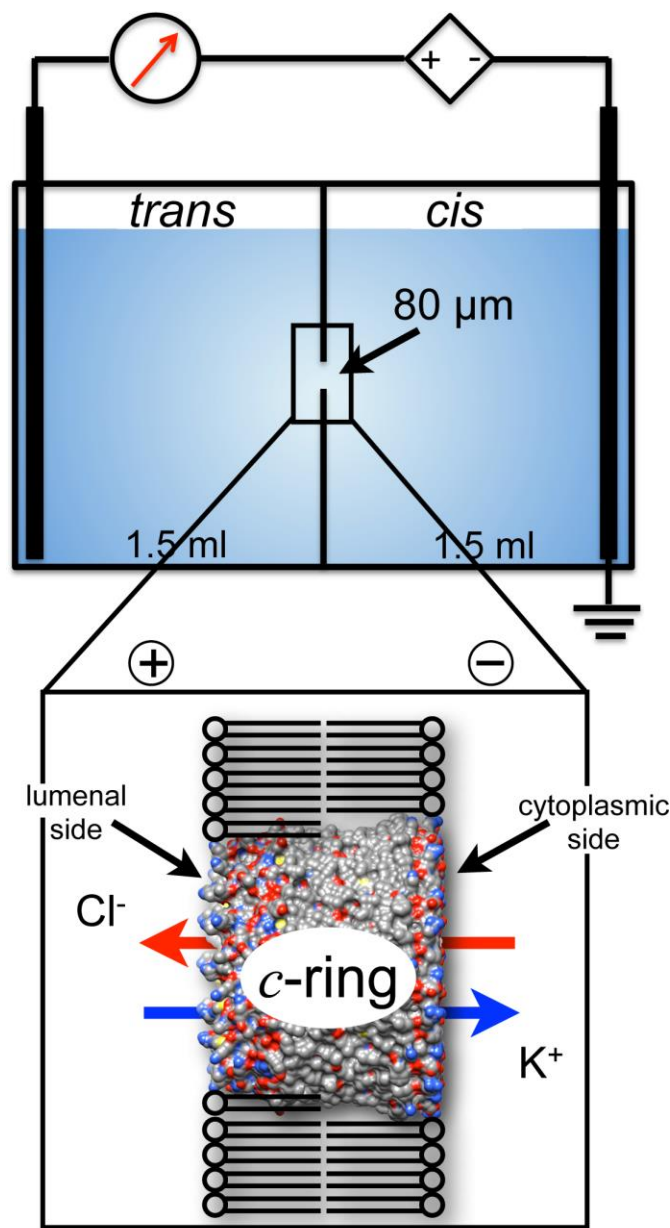

**Figure S2: Schematic of the single-molecule electrophysiology setup.** Both the *cis* and *trans* sides of the chamber contained each 1.5 ml of 10 mM Tris-HCl, pH 8.0, 1 M KCl. The chambers were separated by a planar lipid bilayer of 1,2 diphytanoyl-sn-glycero-phosphatidylcholine, which was formed across a teflon aperture with a diameter of  $\sim 80 \mu\text{m}$ . Monomeric *c*-ring, which was extracted and purified in UnDM and containing less than 1% detergent, was added to the *cis* side to a final concentration of  $\sim 0.2\text{-}0.8 \text{ ng/ml}$ . The *cis* side was grounded, meaning that a positive current represents positive charge moving from the *trans* to the *cis* side, as depicted in the schematic. Electrophysiology measurements were conducted as described in references <sup>2,3</sup>.

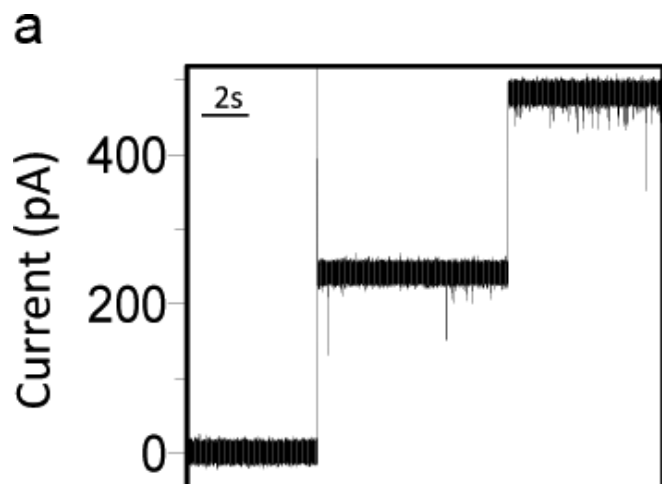

**Figure S3: The c-ring transmembrane protein pore of the V-type ATPase shows a uniform large-conductance signature.** (a) Two consecutive single-channel insertions of the c-ring monomer recorded at a transmembrane potential of +30 mV, resulting in 242 pA and 483 pA current levels. This electrical recording illustrates the uniformity of the single-channel conductance of the c-ring transmembrane protein pore with a value of  $\sim 8$  nS; (b) The current-voltage profile is represented as average over at least three independent single-channel experimental determinations. This profile reveals a linear relationship with a slope of  $\sim 8.3$  nS, which is consistent with an average conductance of  $8.33 \pm 0.24$  nS ( $n=66$ ), as derived from different single-channel determinations at different applied transmembrane potentials.

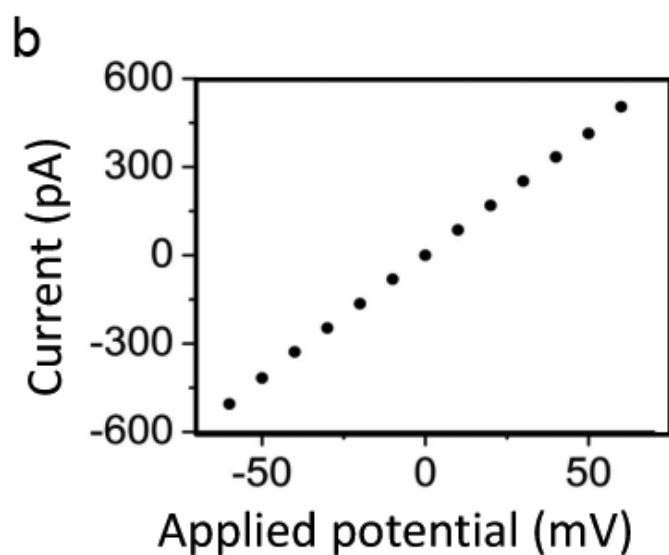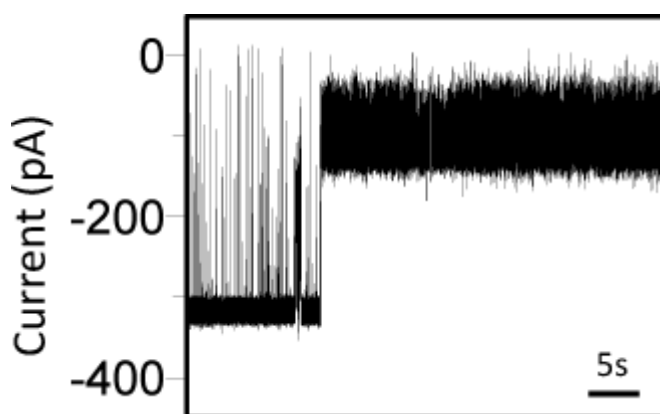

**Figure S4:** A representative long-lived current blockade with a duration of  $\sim 50$  s, which was recorded at a transmembrane potential of  $-40$  mV. These long-lived current blockades were either reversible or irreversible. They were not detected at transmembrane potentials of  $-20$  mV or greater than this value (e.g.,  $-10$  mV).

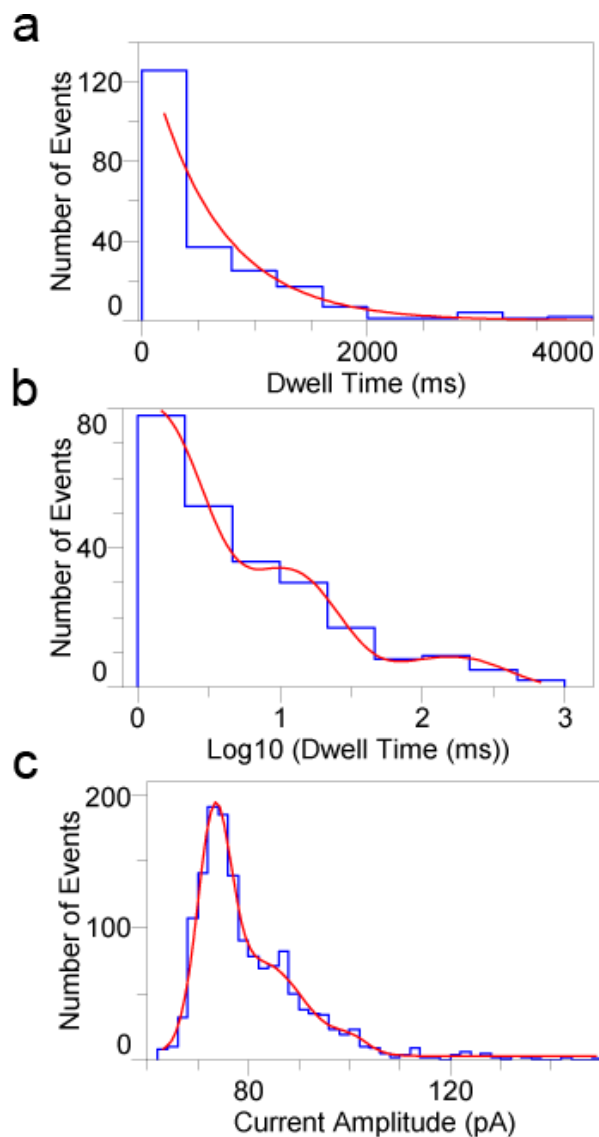

**Figure S5: Dwell time and current amplitude histograms derived from a typical single-channel electrical recording acquired with the *c*-ring transmembrane protein pore at an applied transmembrane potential of -20 mV.** (a) A representative dwell-time histogram of the open events.  $\tau_O = 616 \pm 93$  ms. For the fitting approach, we used a logarithmic likelihood ratio (LLR) test with a confidence number  $C=0.95^{4,5}$ . The fitting method was variable metric on the exponential probability function<sup>6</sup>.  $\chi^2_{\text{crit}} = 5.99$ ,  $\chi^2_{1 \rightarrow 2} = -1179$ ; (b) A representative dwell-time histogram of the closed events. The fitting of this histogram indicated three time constants,  $\tau_{C1} = 1.09 \pm 0.04$  ms,  $\tau_{C2} = 10.1 \pm 0.06$  ms, and  $\tau_{C3} = 156.8 \pm 0.17$  ms, with the normalized probabilities  $P_{C1} = 0.63 \pm 0.02$ ,  $P_{C2} = 0.29 \pm 0.01$ , and  $P_{C3} = 0.08 \pm 0.01$ , respectively. The fitting method was variable metric on the exponential logarithmic-probability function for revealing time constants spanning over a three-order of magnitude range. We used a LLR test with a confidence number  $C=0.95$ . The correlation coefficient was  $R = 0.963$ .  $\chi^2_{\text{crit}} = 5.99$ ,  $\chi^2_{1 \rightarrow 2} = 354.8$ ,  $\chi^2_{2 \rightarrow 3} = 37.90$ ,  $\chi^2_{3 \rightarrow 4} = 0.14$ ; (c) A representative current-amplitude histogram fitted with a three-component Gaussian, revealing current blockade peaks of  $I_{B1} = 73 \pm 1$  pA,  $I_{B2} = 83 \pm 1$  pA, and  $I_{B3} = 100 \pm 2$  pA with the normalized probabilities of  $P_{B1} = 0.46 \pm 0.05$ ,  $P_{B2} = 0.51 \pm 0.09$ , and  $P_{B3} = 0.03 \pm 0.02$ , respectively. The events list file was generated from a single-channel electrical trace with a duration of 135.7 s. pClamp 10.5 software (Axon Instruments) was used for data analysis after the single-channel traces were low-pass Bessel filtered at a frequency of 5 kHz.

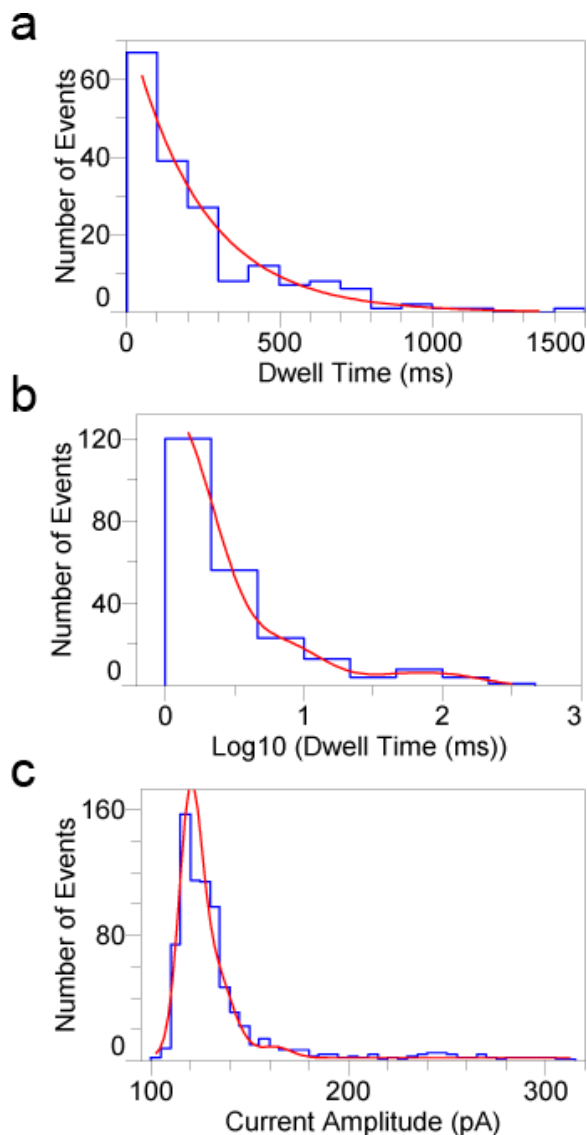

**Figure S6: Dwell time and current amplitude histograms derived from a typical single-channel electrical recording acquired with the c-ring transmembrane protein pore at an applied transmembrane potential of -40 mV.** (a) A representative dwell time histogram of the open events.  $\tau_O = 238 \pm 20$  ms. For the fitting approach, we used a logarithmic likelihood ratio (LLR) test with a confidence number  $C=0.95^{4,5}$ . The fitting method was variable metric on the exponential probability function<sup>6</sup>.  $\chi^2_{\text{crit}} = 5.99$ ,  $\chi^2_{1 \rightarrow 2} = 1.7$ ; (b) A representative dwell-time histogram of the closed events. The fitting of this histogram indicated three time constants,  $\tau_{C1} = 0.847 \pm 0.057$  ms,  $\tau_{C2} = 4.80 \pm 0.16$  ms, and  $\tau_{C3} = 71.20 \pm 0.31$  ms. The normalized probabilities were  $P_{C1} = 0.82 \pm 0.03$ ,  $P_{C2} = 0.14 \pm 0.02$ , and  $P_{C3} = 0.04 \pm 0.01$ , respectively. The fitting method was variable metric on the exponential logarithmic-probability function for revealing time constants spanning over a three-order of magnitude range. We used a LLR test with a confidence number  $C=0.95$ . The correlation coefficient was  $R = 0.964$ .  $\chi^2_{\text{crit}} = 5.99$ ,  $\chi^2_{1 \rightarrow 2} = 360.5$ ,  $\chi^2_{2 \rightarrow 3} = 14.6$ ,  $\chi^2_{3 \rightarrow 4} = -1.8 \times 10^{-5}$ ; (c) A representative current-amplitude histogram fitted with a three-component Gaussian, revealing current blockade peaks of  $I_{B1} = 116 \pm 1$  pA,  $I_{B2} = 127 \pm 1$  pA, and  $I_{B3} = 146 \pm 7$  pA with the normalized probabilities of  $P_{B1} = 0.31 \pm 0.01$ ,  $P_{B2} = 0.50 \pm 0.08$ , and  $P_{B3} = 0.19 \pm 0.07$ , respectively. The events list file was generated from a single-channel electrical trace with a duration of 47.7 s. pClamp 10.5 software (Axon Instruments) was used for data analysis after the single-channel traces were low-pass Bessel filtered at a frequency of 5 kHz.

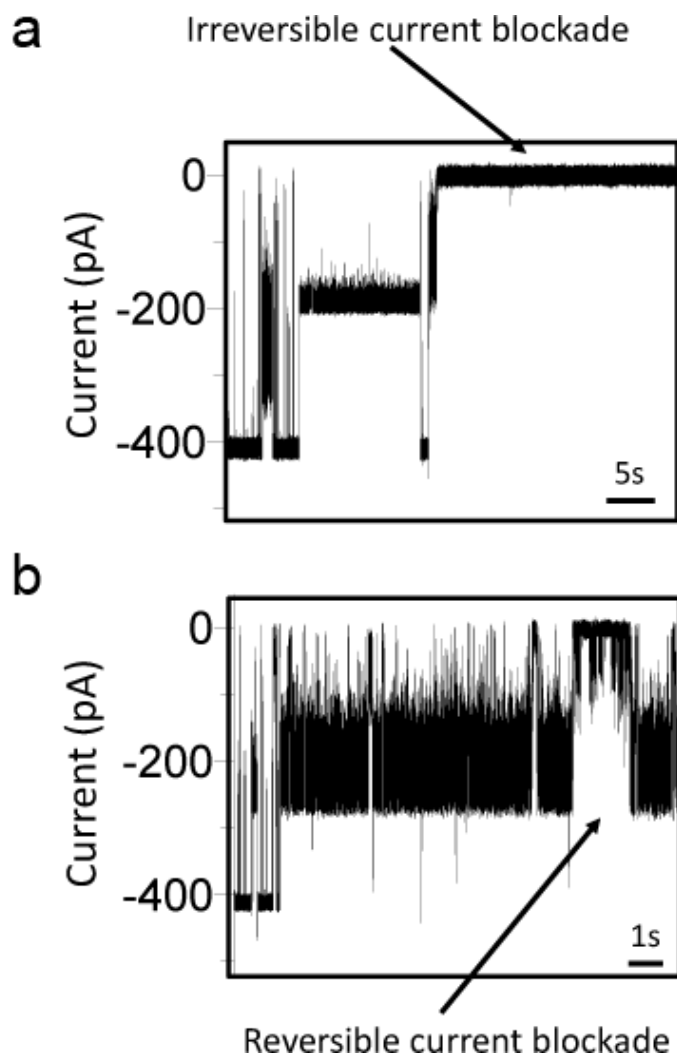

**Figure S7:** A representative single-channel electrical trace, acquired at a transmembrane potential of -50 mV, showing either an irreversible (a) or a reversible (b) current blockade to the fully-closed sub-state.

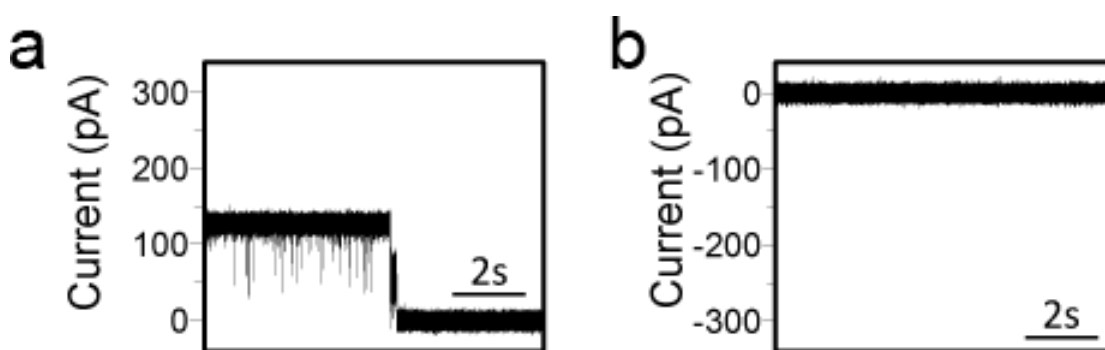

**Figure S8:** Subunit *d* produced greater amplitudes of the current blockades of the *c*-ring transmembrane protein pore when added at a concentration of 0.45  $\mu\text{M}$  to the cytosolic side. In panels (a) and (b), the applied transmembrane potential was +30 and -30 mV, respectively. In (a), a long-lived current blockade to a lower conductance of  $\sim 4.1$  nS was observed, which was followed by a full current blockade. At -30 mV, *c*-ring showed an open-state current decorated by frequent current blockades of varying amplitudes (Fig. 5b, the main text), but this was permanently and fully blocked by 0.45  $\mu\text{M}$  *d* subunit added to the *cis* (cytosolic) chamber (b).

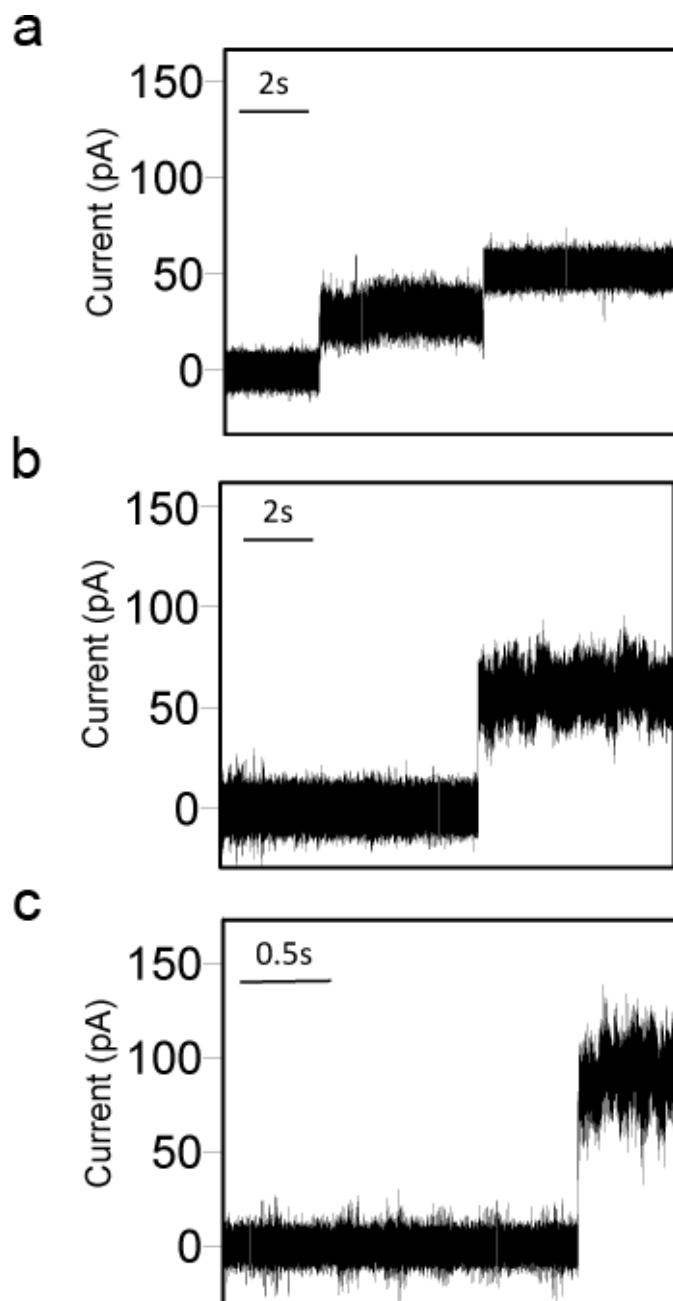

**Figure S9:** Some examples of single-channel insertions of the purified  $V_0$  transmembrane complex in a planar lipid membrane indicates some variability in the unitary conductance. The applied transmembrane potential was +30 mV. Amplitudes of the single-channel currents were (a) 32, (b) 60, and (c) 96 pA.



|    |                                                                                                                      |     |                                                                                                                                                                    |
|----|----------------------------------------------------------------------------------------------------------------------|-----|--------------------------------------------------------------------------------------------------------------------------------------------------------------------|
| c  | AKSGVGICATCVLRP <b>D</b> LLFKNI<br>GDAGVRGSSQQP <b>R</b> LFVGM                                                       | c'' | MN <b>K</b> ES <b>K</b> DD <b>D</b> DMSLGKF<br>FITGSSMIGAGV <b>R</b> AP <b>R</b> IT <b>T</b> KNL<br>GATAAIS <b>D</b> A <b>A</b> D <b>S</b> ALF <b>V</b> K <b>I</b> |
| c' | AKSGIGIAGIGIT <b>F</b> K <b>P</b> ELIMKSL<br>GD <b>V</b> GV <b>R</b> K <b>Y</b> M <b>H</b> Q <b>P</b> <b>R</b> LFVGI |     |                                                                                                                                                                    |

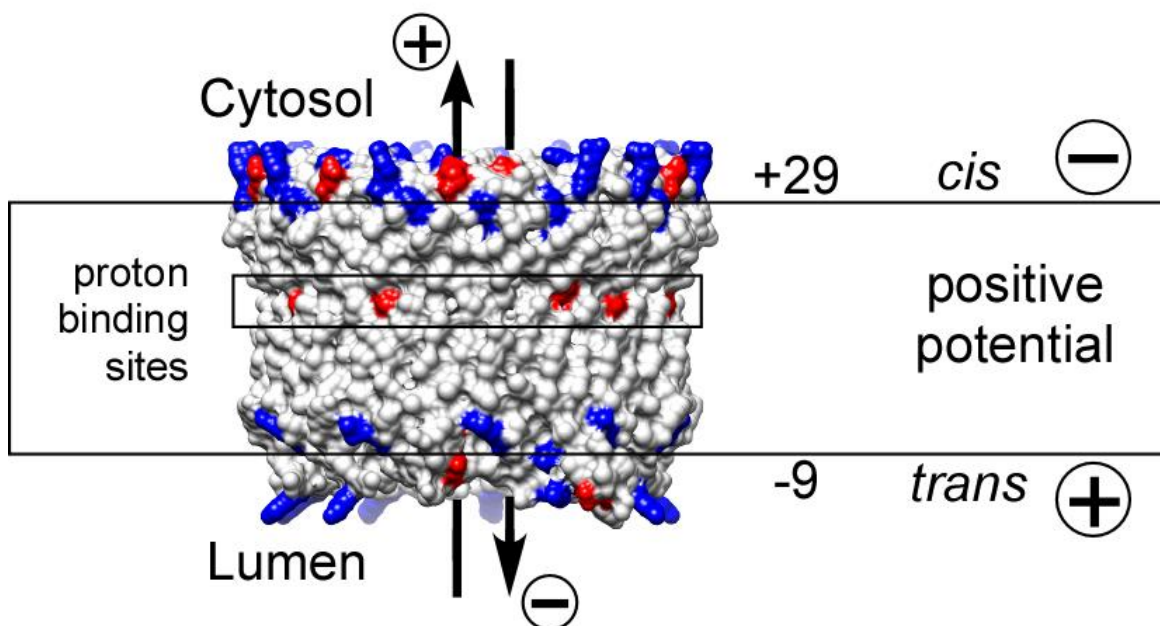

|    |                                                                                                                                                                                    |     |                                                                                                                                                                                         |
|----|------------------------------------------------------------------------------------------------------------------------------------------------------------------------------------|-----|-----------------------------------------------------------------------------------------------------------------------------------------------------------------------------------------|
| c  | M <b>T</b> ELCPV<br>YSLG <b>Q</b> K <b>Q</b><br>LNS <b>R</b> AT <b>Q</b> D <b>V</b> V <b>C</b> -COO <sup>-</sup>                                                                   | c'' | Y <b>K</b> L <b>F</b> T <b>G</b> H <b>G</b> S <b>D</b> IN <b>F</b> G <b>K</b> F <b>L</b> L <b>R</b> T<br>S <b>K</b> L <b>T</b> V <b>A</b> T <b>A</b> E <b>N</b> M <b>Y</b> S <b>K</b> S |
| c' | M <b>S</b> T <b>Q</b> L <b>A</b> S <b>N</b> I <b>Y</b> A <b>P</b> L<br>G <b>N</b> L <b>S</b> P <b>T</b> E <b>D</b> <b>Y</b><br>L <b>N</b> T <b>R</b> G <b>S</b> E-COO <sup>-</sup> |     | M <b>A</b> G <b>K</b> A <b>S</b> E <b>F</b> G-COO <sup>-</sup>                                                                                                                          |

**Figure S10: Amino acid sequence of the cytosolic and vacuolar domains of the yeast V-ATPase proteolipids c, c' and c''.** Surface representation of yeast c-ring. Yeast subunits c (Vma3p), c' (Vma11p) and c'' (Vma16p) were threaded into the crystal structure of the bacterial homolog from the *E. hirae* sodium V-ATPase (subunit K; 2bl2.pdb<sup>7</sup>) using the Phyre2 server<sup>8</sup>. Negatively and positively charged residues are highlighted in red and blue, respectively. Mass spectrometry data of intact subunits showed that the N-termini of subunit c (Vma3p) are acetylated and therefore carry no charge<sup>9</sup>. The model illustrates a clear asymmetry in the overall positive charge distribution at the cytosolic and vacuolar sites of the c-ring. This asymmetric charge distribution likely explains the observed uniform insertion of the c-ring into the planar lipid bilayer. The single orientation was conserved regardless of the polarity of the applied potential.

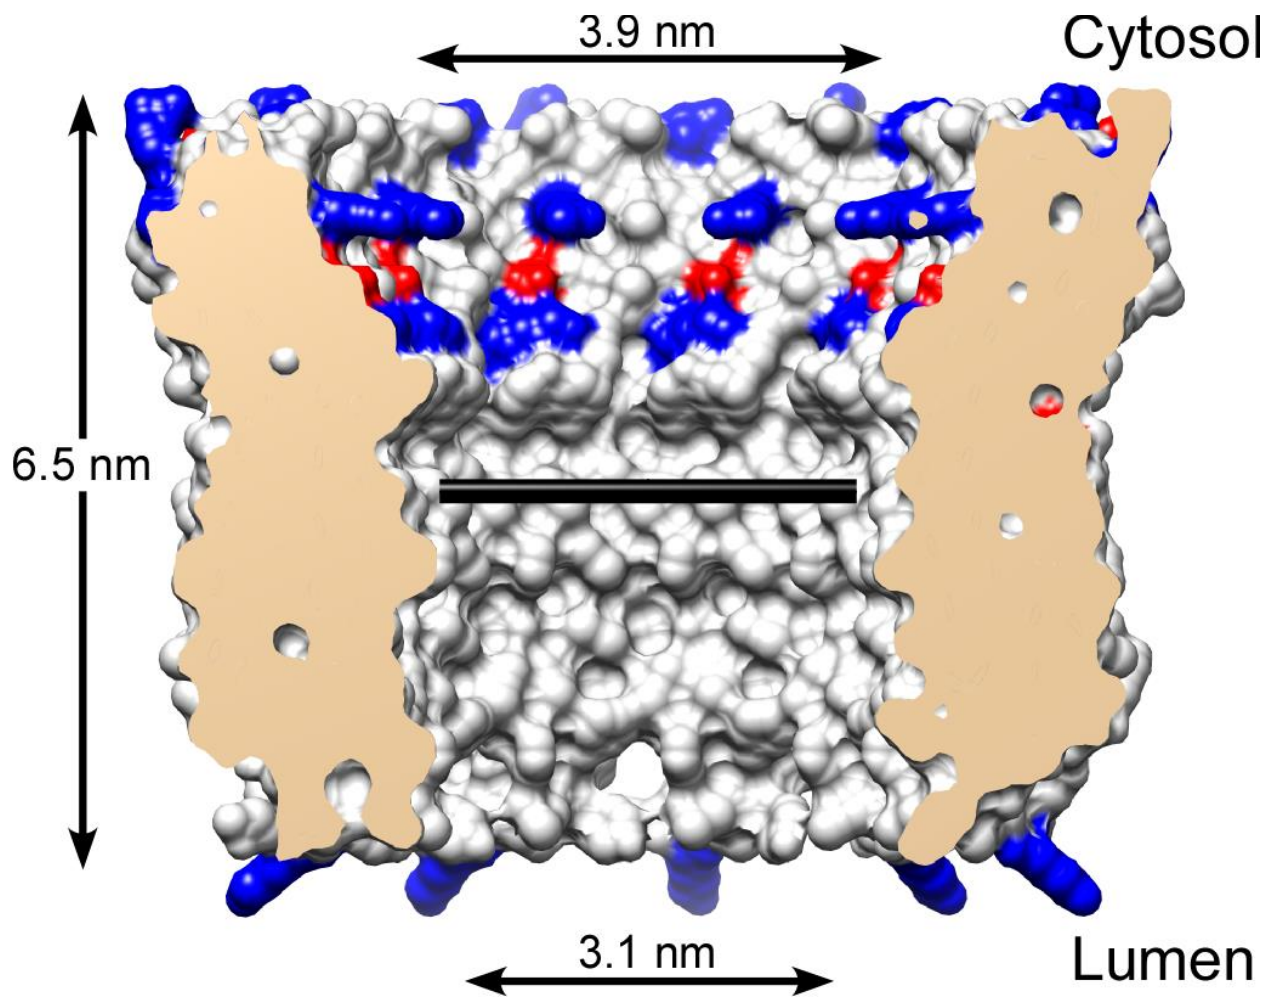

**Figure S11: Internal dimensions of the yeast proteolipid c-ring using a molecular surface representation.** This homology structure was derived using the crystal structure of the bacterial homolog from the *E. hirae* sodium V-ATPase (subunit K; 2b12.pdb<sup>7</sup>) and the Phyre2 server<sup>8</sup>. The horizontal scale bar at the midpoint of the pore lumen measures ~3.5 nm.

## References

1. Wittig, I., Braun, H.P. & Schagger, H. Blue native PAGE. *Nat Protoc* **1**, 418-28 (2006).
2. Niedzwiecki, D.J., Iyer, R., Borer, P.N. & Movileanu, L. Sampling a biomarker of the human immunodeficiency virus across a synthetic nanopore. *ACS Nano* **7**, 3341-50 (2013).
3. Cheneke, B.R., van den Berg, B. & Movileanu, L. Quasithermodynamic contributions to the fluctuations of a protein nanopore. *ACS Chem Biol* **10**, 784-94 (2015).
4. McManus, O.B., Blatz, A.L. & Magleby, K.L. Sampling, log binning, fitting, and plotting durations of open and shut intervals from single channels and the effects of noise. *Pflugers Arch* **410**, 530-53 (1987).
5. McManus, O.B. & Magleby, K.L. Kinetic states and modes of single large-conductance calcium-activated potassium channels in cultured rat skeletal muscle. *J Physiol* **402**, 79-120 (1988).
6. Movileanu, L., Cheley, S. & Bayley, H. Partitioning of individual flexible polymers into a nanoscopic protein pore. *Biophys J* **85**, 897-910 (2003).
7. Murata, T., Yamato, I., Kakinuma, Y., Leslie, A.G. & Walker, J.E. Structure of the rotor of the V-Type Na<sup>+</sup>-ATPase from *Enterococcus hirae*. *Science* **308**, 654-9 (2005).
8. Kelley, L.A., Mezulis, S., Yates, C.M., Wass, M.N. & Sternberg, M.J. The Phyre2 web portal for protein modeling, prediction and analysis. *Nat Protoc* **10**, 845-58 (2015).
9. Couoh-Cardel, S., Milgrom, E. & Wilkens, S. Affinity Purification and Structural Features of the Yeast Vacuolar ATPase Vo Membrane Sector. *J Biol Chem* **290**, 27959-71 (2015).
